# Supplementary material for: Heterogeneous Immunoassay Using Channels and Droplets in a Digital Microfluidic Platform
Source: MDPI journal article supplement (doi:10.3390/mi10020107), 2019-02-05
Supplement: s1 [file s1]

# Supplemental Information: Heterogeneous Immunoassay Using Channels and Droplets in a Digital Microfluidic Platform

Yuguang Liu <sup>1</sup> and Ian Papautsky <sup>2,\*</sup>

<sup>1</sup> Microbiome Program, Center for Individualized Medicine, Mayo Clinic, Rochester, MN 55905, USA; liu.yuguang@mayo.edu

<sup>2</sup> Department of Bioengineering, University of Illinois at Chicago, Chicago, IL 60607, USA

\* Correspondence: papauts@uic.edu; Tel.: +1-312-413-3800

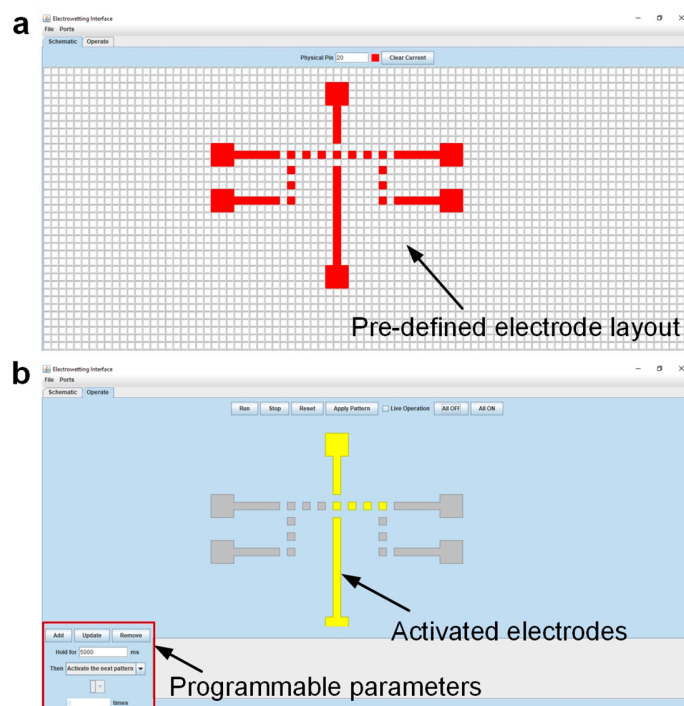

**Figure S1.** GUI used to control automated electrode activation and deactivation. (a) The GUI allows for defining the electrode layout according to customized devices. Each discrete red block indicates one electrode on the DMF device. (b) Each discrete red block indicates an activated electrode, and each discrete gray block indicates an de-activated electrode.

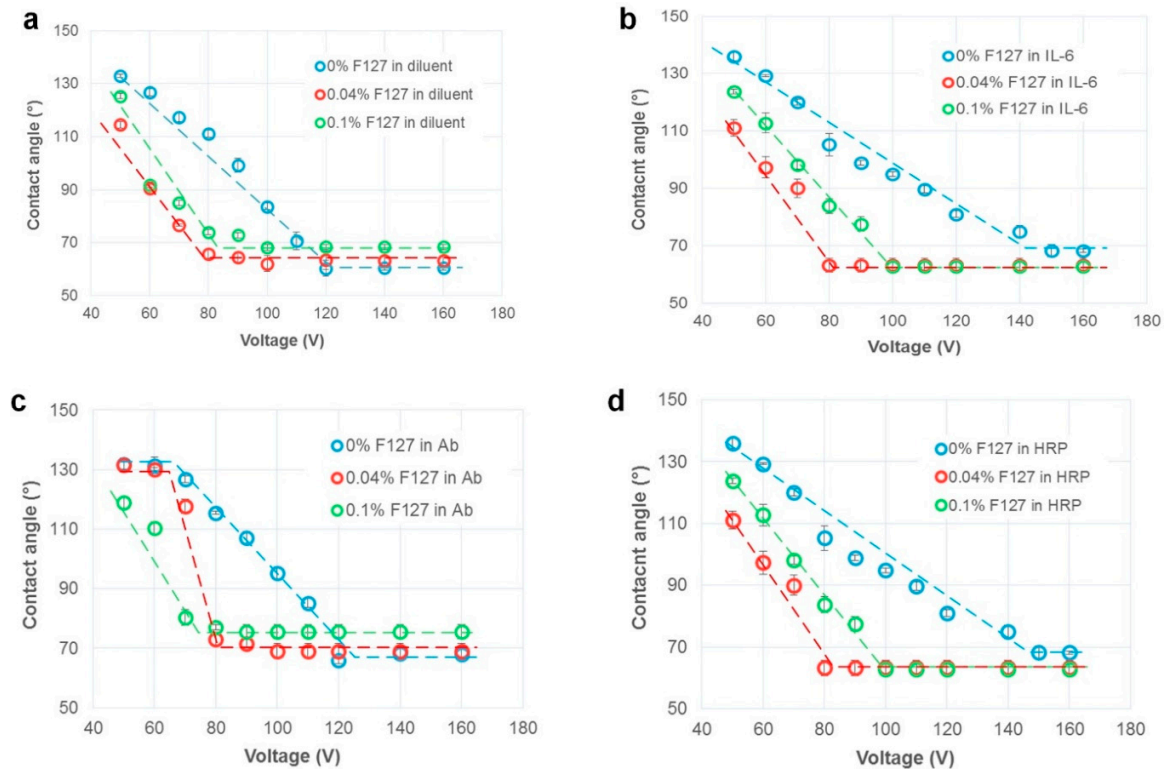

**Figure S2.** Electrowetting characteristics for relevant biological solutions w/o surfactant Pluronic F127. AC voltage from 50–160 V was tested. (a) PBS buffer solution (b) 0.1 mg/mL capture antibody functionalized magnetic beads suspended in PBS (c) 1000 pg/mL human IL-6 standard in PBS (d) 2000 pg/mL detection antibody-HRP conjugates in PBS.

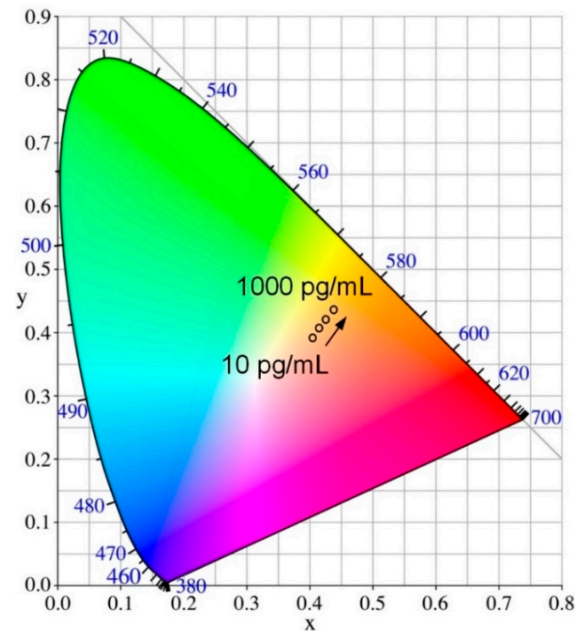

**Figure S3.** Colorimetric image analysis in CIE color space. A shift in the color space toward yellow region corresponds to the higher concentration of IL-6 molecules.
